## **Title Page**

### **Article Title:**

The structure and organization of headache differential diagnoses: A Pilot Study of Subset Relationships between Differentials in ICHD3

### **Authors:**

Pengfei Zhang, MD

### **Corresponding Author:**

Pengfei Zhang, MD

125 Paterson St., Suite 6100

New Brunswick, NJ 08901

phone: 732-235-7729

fax: 732-235-7041

email: pz124@rwjms.rutgers.edu

### **Author affiliations:**

Department of Neurology, Rutgers Robert Wood Johnson Medical School, New Brunswick, New Jersey, USA (Pengfei Zhang)

### **Conflict of Interest Statement:**

Pengfei Zhang: He has received honorarium from Alder Biopharmaceuticals, Board Vitals, and Fieve Clinical Research. He collaborates with Headache Science Incorporated without receiving financial support. He has ownership interest in Cymbeline LLC.

### **Key Words:**

**Financial Support:** This research received no specific grant from any funding agency in the public, commercial, or not-for-profit sectors.

**Trial Registration:** Not applicable.

### **Abbreviations:**

**Acknowledgements:** None

## **Structured Abstract**

### **Objective:**

Differential diagnosis is fundamental to medicine. Using DiffNet, a differential diagnosis generator, as a model we studied the structure and organization of how collections of diagnose (i.e. sets of diagnoses) are related in the ICHD3. Specifically, we asked: Which sets of differential diagnoses are subsets of each other? What is the minimum number of sets of differential diagnoses that encompass all ICHD3 codes? Furthermore, we explored the clinical and theoretical implication of these answers.

### **Methods:**

DiffNet is a freely distributed differential diagnosis generator for headaches using graph theoretical properties of ICHD3. For each ICHD3 diagnosis, we generated a set of differential diagnoses using DiffNet. We then determined algorithmically the set/subset relationship between these sets. We also determined the smallest list of ICHD3 diagnosis whose differential diagnoses would encompass the totality of ICHD3 diagnoses.

### **Results:**

All ICHD3 diagnoses can be represented by a minimum of 92 differential diagnosis sets. Differential diagnosis sets for 10 of the 14 first digit subcategories of ICHD3 are

represented by more than one differential diagnosis sets. Fifty-one of the 93 differential diagnosis sets contain multiple subset relationships; the remaining 42 do not enter into any set/subset relationship with other differential diagnosis sets. Finally, we included a hierarchical presentation of differential diagnosis sets in ICHD3 according to DiffNet.

### **Conclusion:**

We propose a way of interpreting headache differential diagnoses as partial ordered sets (i.e. poset). For clinicians, fluency with the 93 diagnoses and their differential put forth here implies a complete description of ICHD3. On a theoretical level, interpreting ICHD3 differential diagnosis as poset, allows researchers to translate differential diagnoses sets topologically, algebraically, and categorically.

## **Introduction:**

Differential diagnosis is fundamental to clinical medicine.<sup>1,2</sup> Since candidate diagnoses in a differential form a collection of objects, this collection satisfies the mathematical definition of a set. To our knowledge, a project studying differential diagnosis hierarchically using set/subset relationship between sets of differentials has not been done. We sought to explore precisely the structure and organization of this hierarchy in headaches.

Although the International Classification of Headache Disorders (ICHD3) provides structure for headaches classifications, it does not inherently classify differential diagnoses. Nevertheless, the ICHD3 do provide differential diagnosis considerations by cross-references of diagnosis codes. For example, “headaches secondary to TIA” is not hierarchically associated with migraine with aura but the latter is a differential diagnosis of the former; this can be seen by the observation that migraine with aura (ICHD code 1.2) is listed as a reference in the comment section of headache caused by TIA (6.1.2). We took advantage of this observation in our previous work to construct DiffNet, a freely distributed differential diagnosis generator published under Rutgers University.<sup>3,4</sup> DiffNet is an image of ICHD3 in a graph theoretic form where crosses referenced of ICHD3 are interpreted as “differentials”.

Using DiffNet as a model, we asked: What is the set/subset relationship between differential diagnosis? What is the minimum sets of differential diagnosis sets needed to cover all of ICHD3 diagnosis codes? In answering these questions, we sought to provide a hierarchical classification and ordering of sets of differential diagnosis as a reference for clinicians. We believe such a classification would be invaluable when expanding/narrowing one's differential diagnosis in headache. This arrangement of set/subset relationship also contains theoretical implications; for the technical readers, we explored these implications in Addendum 1.

### **Methodology:**

Our study was conducted in two phases: 1) the differential diagnosis generation phase and 2) the set/subset generation phase. The differential diagnosis generation phase consisted of the building of DiffNet; we will review it here.<sup>4</sup> The set/subset generation phase involved determining the set/subset relationships between differential diagnosis groupings.

### **The Building of DiffNet, the differential diagnosis generator:**

DiffNet reinterprets ICHD3 as a graph in the following fashion: each ICHD3 diagnosis is considered a “node”; if one ICHD3 diagnosis references another ICHD3 diagnosis anywhere in the criterion or comment section, then an “edge” exists between the two.

Furthermore, an edge exists between two ICHD3 diagnoses if they are connected through the ICHD3 hierarchy.

For example 6.1 and 6.1.1 are connected since the latter is a sub-section diagnosis of the former. However, 6.1.1.1 and 6.1.1.2 are not necessarily connected as an edge as they are on the same level. (On the other hand, 6.1 and 6.1.1.1 are connected despite that they are once removed.) This ICHD3 graph is undirected and contains 387 nodes (due to diseases with duplicate diagnostic codes, for example “complications of migraine”, 1.4 and A1.4).

An editorial choice was made by DiffNet to consider duplicated diagnosis the same as long as they are called by the same name; for example 1.4 and A1.4 are considered as the same entity.

DiffNet then operates in the following fashion to generate differential diagnosis: when given an ICHD3 diagnosis code as an input node, DiffNet look for all “first-degree neighbors” of that diagnostic code. First-degree neighbor is graph theoretic parlance for all nodes connected to a given node via an edge. These “first degree neighbors” are output to the user as differential diagnosis. (DiffNet also provides “second degree neighbors” as well in order to describe less likely differential diagnoses. We ignore these in this project.)

Consider “cervicogenic headache” as an example: The “first degree neighbors” of this node/ICHD3 diagnosis are the following:

headache attributed to cervical myofascial pain

headache attributed to upper cervical radiculopathy

headache attributed to disorder of the neck

migraine

chronic tension-type headache associated with pericranial tenderness

infrequent episodic tension-type headache associated with pericranial tenderness

frequent episodic tension-type headache associated with pericranial tenderness

tension-type headache (tth)

headache or facial pain attributed to disorder of the cranium neck eyes ears nose

sinuses teeth mouth or other facial or cervical structure

diving headache

In other words, the above are ICHD3 diagnoses that are either mentioned in the criterion/comment section – such as “Headache attributed to cervical myofascial pain” (A11.2.5) - or is connected via ICHD3 hierarchy – such as, “Headache attributed to disorder of the neck”(11.2). Notice that edges that are established elsewhere in ICHD3 are also included in the differential. For example, “diving headache” is included since it was



mentioned not in the cervicogenic headache section but rather in 10.1.3 as a potential differential of diving headache: “... 11.2.1 cervicogenic headache can occur during a dive.” (page 140 of ICHD3).<sup>5</sup>

The building of DiffNet was accomplished through Python with NetworkX library; C# was used as an interface. The algorithm is freely distributed through user registration by Rutgers University at [http://license.rutgers.edu/technologies/2019-070\\_diffnet-headache-differential-diagnosis-software](http://license.rutgers.edu/technologies/2019-070_diffnet-headache-differential-diagnosis-software). (To use algorithm, simply enter input diagnosis as lower case.) The source code is proprietary to Rutgers University but maybe opened to limited disclosure with inquiry to the author. The parsing of ICHD3 for DiffNet was accomplished through the Haskell programming language.

### **Determining Set/Subset Relationships:**

Once DiffNet was generated, each of the ICHD3 diagnoses code was algorithmically entered into DiffNet to generate a list of differential. We call the set of differential diagnosis generated by a specific ICHD3 diagnostic node the differential diagnosis set *induced* by that specific diagnostic code. For example, in our example above, the set of differential induced by “cervicogenic headache” is the first-degree neighbors generated by DiffNet.

Once sets of differential diagnoses induced by each of the ICHD3 diagnostic codes were obtained, we then algorithmically obtained all possible *proper subset* relationships between differential diagnosis sets.

Recall that subset and proper subset is defined mathematically as the following:

Let A and B be sets, B is a subset of A if and only if every member of B is a member of A. We call A the super-set of B. Furthermore, B is a proper subset of A if it is strictly contained in A.<sup>6-8</sup>

Consider the following example on three sets. The differential diagnosis set induced by “migraine with aura” is:

familial hemiplegic migraine type 3 (fhm3)

typical aura with headache

familial hemiplegic migraine type 1 (fhm1)

pure menstrual migraine with aura

probable migraine

chronic migraine (alternative criteria)

headache attributed to moyamoya angiopathy (mma)

episodic syndromes that may be associated with migraine

sporadic hemiplegic migraine (shm)

benign paroxysmal torticollis

headache attributed to mitochondrial encephalopathy lactic acidosis and stroke-like episodes (melas)

angiography headache

headache attributed to an intracranial endarterial procedure

familial hemiplegic migraine (fhm)

triptan-overuse headache

menstrually related migraine with aura

familial hemiplegic migraine type 2 (fhm2)

headache attributed to other chronic intracranial vasculopathy

migraine aura status

headache attributed to transient ischaemic attack (tia)

status migrainosus

vestibular migraine

typical aura without headache

migraine with typical aura

migraine aura-triggered seizure

familial hemiplegic migraine other loci

retinal migraine

visual snow

migraine with brainstem aura

infantile colic

chronic migraine

hemiplegic migraine

persistent aura without infarction

headache attributed to cerebral autosomal dominant arteriopathy with subcortical infarcts and leukoencephalopathy (cadasil)

probable migraine with aura

headache attributed to arteriovenous malformation (avm)

migrainous infarction

non-menstrual migraine with aura

migraine without aura

headache attributed to cerebral venous thrombosis (cvt)

migraine

migraine with aura

The differential diagnosis set induced by “familial hemiplegic migraine (fhm)” is:

familial hemiplegic migraine type 3 (fhm3)

familial hemiplegic migraine type 1 (fhm1)

hemiplegic migraine

familial hemiplegic migraine (fhm)

sporadic hemiplegic migraine (shm)

familial hemiplegic migraine other loci

familial hemiplegic migraine type 2 (fhm2)

migraine

migraine with aura

Furthermore differential diagnoses induced by “familial hemiplegic migraine type 3 (fhm3)” is:

familial hemiplegic migraine type 3 (fhm3)

migraine

familial hemiplegic migraine (fhm)

hemiplegic migraine

migraine with aura

We can write that the differential diagnosis set induced by “familial hemiplegic migraine type3” (we call this *differential set* for short) is a proper subset of differential set induced by “familial hemiplegic migraine (fhm)”, which in turn is a proper subset of differential set induced by “migraine with aura”. Symbolically, we can write the following: differential diagnosis set induced by “familial hemiplegic migraine type3”  $<$  differential set induced by “familial hemiplegic migraine (fhm)”  $<$  differential set induced by “migraine with aura”.

All such set/subset relationships between differential diagnosis sets in the ICHD3 were determined and recorded. (These relationships form a poset in order theory parlance. We investigated the theoretical implications of this in the technical addendum.)

We then algorithmically determined the minimum set of ICHD3 whose differential diagnoses encompass the totality of ICHD3. We call these sets the *lower-sets*. We further analyzed the resultant set/subset relationships by comparing them against the ICHD3 categories.

The set/subset phase of the project was accomplished through the Haskell programming language. Figure 1 was generated using Gephi. Codes are available upon request from the author with permission from Rutgers University.

## **Results:**

A total of 1368 edges and 387 nodes were generated by DiffNet. There are 584 proper subset relationships. The differentials encompass all of the ICHD3 diagnoses. Of these, all 14 first digit level of the ICHD3 diagnostic criteria are present.

Table 1 displays the 91 lower-sets, of these 51 contains subsets (Table 1a). There are 42 differential sets (we call them *singletons*) that are neither subset nor superset of another set. We display these in Table 1b. The complete lists of all set/subset relationships are

displayed in Table 2, hierarchically, similar to ICHD3. We will reference each diagnosis by their section and subsection numbers. For example, “visual snow” is “31v”.

The 14 first digit levels of ICHD3 criteria are represented by the following differential groups:

1. Migraine is represented by sets 26, 31, 32, 33, 35.
2. Tension-type headaches is represented by sets 6, 9, 29, 48, 49, 50.
3. Trigeminal autonomic cephalalgias is represented by sets 5, 7, 25, 46, 47.
4. Other primary headache disorders is represented by sets 8, 28, 37, 42, 43, 44, 45.
5. Headache attributed to trauma or injury to the head and/or neck is represented by sets 1, 22, 41.
6. Headache attributed to cranial or cervical vascular disorder is represented by sets 2, 11, 17, 20, 39, 40.
7. Headache attributed to non-vascular intracranial disorder is represented by sets 13, 14, 16, 18, 21.
8. Headache attributed to a substance or its withdrawal is represented by sets 3, 10, 23, 27, 30, 34.



9. Headache attributed to infection is represented by sets 15.
10. Headache attributed to disorder of homeostasis is represented by sets 12.
11. Headache or facial pain attributed to disorders of the cranium, neck, eyes, ears, nose, sinuses, teeth, mouth or other facial or cervical structure is represented by sets 4, 24.
12. Headache attributed to psychiatric disorder is represented by sets 19.
13. Painful lesions of the cranial nerves and other facial pain is represented by sets 38, 51.
14. Other headache disorders is represented by sets 36.

We present the set/subset relationship graphically with arrows pointing from the super-set to its subset for visualization in Figure 1. We excluded the 42 singleton from this graph as these data points contain no arrow.

Twelve “inversions”/“violators” of ICHD3 hierarchical orders exist for differential sets. Consider two examples: A1.2 Migraine with Aura is hierarchically not connected to A1.6.4, infantile colic, but the differential set of the latter is a subset of the former. Diagnosis code 8.1.4.2 Delayed alcohol-induced headache is under 8.1.4 alcohol-induced headache,

however the former is a superset for the latter. We present these in Table 3. Here, superset and subset relationships are represented by the format “superset, subset”.

Finally, the “lower bounds” (i.e. “meet”) of differential sets were calculated and presented in Table 4. A technical addendum (Addendum 1) is included to explore this and other theoretical implications of this project.

## **Discussion**

The goal of this project is two-fold: 1) to explore the methodological possibility of structuring subset relationship between differential diagnoses and 2) to apply this technique to headache disorders as presented in ICHD3. We believe such a construction for differential diagnoses carries the practical implications of allowing clinicians to widen or narrow differential diagnosis for real life scenarios in headaches; indeed, Table 2 of this project is intended as such a reference guide. As a methodological exploration, we envision the methods of this project to be applied to other differential diagnosis generators. The theoretical/mathematical implications of this construction are explored in the technical addendum.

(An important caveat: We must remember in dealing with these differential sets to not think of only the disease entity the differential set is named after, but rather its underlying set of differential diagnosis, which is what they are in reality.)

### **Difference and Similarities with ICHD3 and its implications:**

To answer the question “Which sets of differential diagnoses are subsets of each other?” we consider the similarities and differences between ICHD3 classification and differential diagnosis hierarchy.

A number of ICHD3 diagnoses hierarchy do contain value for differential diagnosis generation. For example, when diagnosing a patient with “migraine with aura”, the ICHD3 allows practitioners to effectively classify and therefore generate a potential differential diagnosis for the specific types of migraine aura. Therefore, a number of super-sets are mirrors their ICHD3 counterparts:

Headache attributed to homeostasis (super-set 12)

Headache attributed to infection (super-set 15)

Headache attributed to non-vascular intracranial disorder (super-set 18)

Headache attributed to psychiatric disorder (super-set 19)

Headache or face pain attributed to disorder of the cranium, neck, eyes, ears, nose, sinuses, teeth, mouth, or other facial or cervical structure (super-set 24)

Painful lesions of the cranial nerves and other facial pain (super-set 38)

Trigeminal neuralgia (super-set 51)

Intuitively, the phenotypes within these sets reflect the underlying pathophysiology. For example, diseases from different homeostasis may present phenotypically similar and therefore its diagnostic investigation (i.e. differential diagnoses) mirrors its classification.

Despite these similarities, the hierarchy generated by this project is in general “wider” yet “shallower” hierarchically than the ICHD3. For example, the maximum depth of ICHD3 is 5 levels (cf ICHD3 8.2.3.2.1 “acetylsalicylic acid over-use headache”), whereas the differential diagnosis hierarchy is only maximumly 4 levels deep. On the other hand, there are 3 parts with a total of 14 categories in ICHD3; our project requires a total of 93 differential diagnosis sets. In other words, differential diagnosis hierarchy splits disease classifications hierarchy. To understand the way in which this is accomplished, consider the following non-exhaustive list of differences between the hierarchy of ICHD3 and the hierarchy of differential diagnosis sets:

First, a number of stroke sub-classifications in ICHD3 become disparate super-sets in the differential hierarchy – for example, differential super-set 2, 17, 20, 39, and 40 are not subsumed under super-set 11, “headache attributed to cranial and/or cervical vascular disorder”. The likely explanation for this is that 2, 17, 20, 39, 40 are vascular disorders with symptoms that are phenotypically (although not necessarily pathophysiologically) different than the typical super-set 11 presentation. Consider RCVS (super-set 20) for example, the thunderclap onset of RCVS is distinct from what headaches from ischemic stroke classically presents. (Per ICHD3’s own admission, ischemic stroke headache presents in ischemic stroke in only one-third of the cases whereas the phenotype of RCVS as thunderclap made it into the criteria itself.) The immediate implication of this observation clinically is that clinicians should view vascular headaches as having 6 different phenotypes of presentations.

Similarly, traumatic headaches are described by super-set 1, 22, and 41. The likely etiology for this difference is that phenotypically acute versus persistence of headache post-traumatically represents two very distinct phenotypes in post-traumatic headaches. (We are not, of course, stipulating whether this is a correct/adequate classification of post-traumatic headaches, as is being questioned by a number of recent researches; we are simply stating

that according to ICHD3, the acute versus chronic phenotype appears to be salient distinction between ICHD3 subtypes of post-traumatic headaches.)<sup>9</sup>

ICHD3 classification of “other primary headache disorders” (super-set 38) contains a number of headache conditions are so different that each becomes their own super-sets of differential diagnosis. This is evidenced by the fact that super-set 8, 28, 42, 43, 44, 45 ought to be included in super-set 38. Likely the reason is that although super-set 38 contains these diagnoses due to ICHD3 hierarchy, yet these diagnoses are so disparate that they simply contain their own sets of differentials.

High or low CSF pressure headaches, although pathophysiologically linked, present differently that their differentials form separate sets (super-sets 14, 16, 21). This ought not to be a surprise to any clinicians as elevated CSF pressure is associated with symptoms such as papilledema and vision changes while low CSF pressure is associated symptoms such as orthostatic headache.<sup>5</sup> (Albeit apart from these textbook presentation, paradoxical cases exists.)<sup>10</sup>

Finally, we note that migraine is classified under various different super-sets: 26, 31, 32, 33, and 35. This highlights that phenotypically migraine without aura presents differently than migraine with aura (namely, the aura phase). Thus the aura phase induces very different clinical considerations in differential differential.

### **Inversion of orders and violators of ICHD3 orders:**

Only a handful of differential diagnosis sets violates ICHD3 hierarchical order, as presented in Table 3. For the most part, these “violators” of ICHD3 hierarchy are simply minor restructuring of closely related ICHD3 diagnosis. Two of these “violators”, for example, are putting differential sets induced by “idiopathic” diagnosis under “secondary” diagnosis: for example, differential set induced by idiopathic nervus intermedius neuralgia is a subset of secondary nervus intermedius neuralgia. This simply reflects the reality of differential diagnosis generation: differential for considering secondary cause should be “bigger” than the differential of idiopathic causes for a disease, where presumably one considers the latter only when a number of known causes have been ruled out.

### **51 Super-set and the 42 Singletons:**

Our project offers an answer to the questions: “What are the minimum number of differential diagnosis sets that needs to be obtained in order to cover all of ICHD3 diagnosis?” We present the answer in Table 1 as 93 sets, differential diagnoses of which encompass all of ICHD3 diagnoses. An important clinical implication is that since the 93 lower-sets allows for a complete differential diagnosis of all of ICHD3 differentials, to efficiently diagnose patients clinicians may consider as first point of entry which of the 93 diagnoses a case is likely to represent.

There are 42 differential sets which we may call “singletons” – they are differential diagnoses sets that are neither subset nor super-set for other sets in the ICHD3. In other words, the diagnosis which induce the differential sets are unique. Some of these singleton sets appear to exist because their headache phenotype is so stereotypical so as to provide a very narrow differential. For example, MELAS and trochlear headaches are rather specific in that the former contains stereotypical image findings while the latter contains a stereotypical exam finding.<sup>11,12</sup> Others singletons appear to stand alone because the differential for them is broad in unique combinations. An example is NDPH, which provides a rather broad but unique differentials.<sup>13</sup> “Probable migraine” and “probable tension type headache”, for example, likely offer similar broad differential; for the former, it is often made, only partly in jest, that “Everything is migraine... Unless It Isn’t.”<sup>14</sup>

### **Strength:**

Methodologically, the ability to explore differential diagnosis as subset relationships allows for a well-structured classification of clinical reasoning in headache medicine. Such a structured view of differential diagnosis in headaches may allow clinicians to expand/narrow their differential structurally by tracing differential diagnosis hierarchy. As such, we hope that Table 2 would become for clinicians a useful resource. Since similarities or differences in differential diagnosis set is analogous to similarities or differences in



disease presentation/phenotype, our classification can be viewed as a phenomenological classification of headaches (as opposed to the pathophysiological classification of ICHD3). Finally, since subset relationships satisfies what is mathematically termed a pre-order, when multiple clinical diagnoses are considered, sets can be “composed” additively, while still remaining theoretically coherent. (See theoretical addendum.)

Differential diagnosis generators can be variable in its quality. Using DiffNet as a source to study differential diagnosis sets has the benefits of being fully transparent in how differential diagnosis are generated. Specifically, there is a well defined way of enumerating differential for any given ICHD3 disorder under DiffNet. In addition, as DiffNet is simply a graphic representation of ICHD3, it is fully reproducible. As references between ICHD3 diagnoses are written by groups of international headache specialists, the source material for DiffNet is also of good authority. Finally, it has the benefit of being free to the public.

### **Limitations and Future Direction:**

This project’s reliance on DiffNet and its methodology introduces limitations. Of course, cross-references in ICHD3 was not written for the purpose of differential diagnosis generation. As such, cross-references may not be clinical but pathophysiological, or at

times maybe made to emphasize differences rather than similarities. This is an important limitation of using DiffNet for our project.

Furthermore, our prior editorial decision to include ICHD3 “alternative diagnosis” in DiffNet has downstream effect on this project: migraine or tension type headaches are presented with multiple definitions and, as such, comes with differential sets of differential diagnosis. A future direction should be to explore the effect of reconciling these differences.

Of course, methodologically, there is no reason why another differential diagnosis algorithm cannot be used to generate a differential diagnosis hierarchy using our methodology. Indeed, we encourage such an enterprise by readers to explore what would happen to differential diagnosis hierarchy if a neurology textbook, an alternative commercial project, or even an internal medicine textbook is used as input rather than DiffNet.

### **Conclusion:**

We believe our projects carries implications for headache classification, for headache education, and finally as a differential diagnosis reference tool. For headache classification, our schema suggests that future headache classification schema may consider separations of

a number of phenotypically different diseases. For headache education, we believe that education specifically on the 93 differential diagnosis superset would provide a more comprehensive headache curriculum. Finally, we believe the classification schema in our project would serve as an effective differential diagnosis tool for clinicians.

### **Clinical Implications:**

- Sets of differential diagnosis can be arranged in subset relationships for ICHD3 diagnosis.

We offer this as a reference tool for the clinicians.

- The differential diagnoses from 93 ICHD3 diagnoses are sufficient to encompass all off ICHD3 diagnosis codes.

## **Addendum 1 (The Technical Addendum)**

The study of sets and their subsets relations belong to the mathematical discipline of order theory and lattice theory.<sup>15</sup> The theoretical underpinning of this project is the application of these theory to the realm of differential diagnosis. In this technical addendum we will identify the mathematical and theoretical basis of our project.

First, let us introduce two closely related mathematical concepts, partial ordered sets (called posets for short) and preorder.<sup>16,17</sup>

### **Definition: Partial Preorder:**

Given  $P$  and elements  $a, b$  in  $P$ , then  $P$  is a partial preorder if:

1.  $a \leq a$  for all  $a$  in  $P$
2. If  $a \leq b$  and  $b \leq c$  then  $a \leq c$ .

### **Definition: Strict Preorder:**

1.  $(a < a)$  is false for all  $a$  in  $P$
2. If  $a < b$ , and  $b < c$ , then  $a < c$ .

With the above two definitions, we can introduce partial ordered set, often called “poset” for short.

### **Definition:**

Partial ordered sets is a set  $(P, \leq)$  such that  $P$  is a set and  $\leq$  is a partial preorder on  $P$ .

Of note, any poset can be graphically represented using Hasse Diagram where set/subset relations are described by lines representing set/subset relationships in a downward fashion. We have avoided this presentation for clarity for the non-technical reader.

### **A Potential Topological Implication:**

It is well established that posets is isomorphic to a topological space called the Alexandrof Space. Therefore, an implication of our project is that the subset relations between differential diagnoses may, with slight modification, be interpreted topologically.<sup>18</sup> To our knowledge, this is only the second incidence of interpreting clinical entities topologically. (The first one was proposed by the author.)<sup>19</sup> This correlation to topology can be exploited in future endeavors of translating theorems proved in Alexandrof Topology to the subset relation of differential diagnoses.

### **Joint Semilattice:**

As a poset, our project turns differential diagnosis sets into a join-semilattice if we allow all 51 super-set as well as singletons to be subsumed under a common heading. (We can call this 1, as per lattice theory parlance.) Consider the following definition:

**Definition:**<sup>20</sup>

Let  $(P, \leq)$  be a poset and  $x$  and  $y$  elements of  $P$ . Then meet of  $x$  and  $y$ , denoted  $x \sqcap y$ , is the following, if it exists:

$$\max\{\text{for all } w \text{ in } P: w \leq x, w \leq y\}$$

Similarly, the join of  $x$  and  $y$ , denoted  $x \sqcup y$ , is the following, if it exists:

$$\min\{\text{for all } z \text{ in } P: x \leq z, y \leq z\}$$

In other words, meet is the maximum lower bound and join is the minimum upper bound between  $x$  and  $y$ . We can then define semilattice as the following: If every pair in  $x, y$  in  $P$  has a join then it forms a join semilattice. Similarly, if every pair  $x, y$  in  $P$  has a meet then it forms a meet semilattice.<sup>21,22</sup>

We can prove computationally that our 51 poset is indeed such a construction. (We include this as Supplementary Material 1.) Since the join of any two singleton is 1 and the join of any singleton with any elements of the 51 poset semilattice is also 1, we can then confirm that our construction forms a join semilattice.

**“Addition” of Differential Diagnosis as Algebraic implication:**

Any join semi-lattice can be viewed as a idempotent and commutative monoid under “join” operation, therefore our construction is a monoid.<sup>23</sup> We can view the “join” operation as therefore a sort of “addition” for differential diagnoses. For example, given differential diagnosis a and b, we can always find a differential diagnosis set that includes both as its subset. For example, the “addition” (under “join” operation) of differential sets “visual snow” (31v) and “retinal migraine”(31r) would be the differential diagnosis set of “migraine”(31).

More interestingly is investigating whether “meet” exists in our poset; if addition of differential diagnosis through “join” is considered “expansion” of differential, then addition of differential through “meet” would be consider the narrowing of differential. We screened all possible non-trivial lower bound for meet as part of our project. (Trivial here means that if  $a = \text{meet}(a, b)$  then it is trivial.) Result is presented in Table 4. Unfortunately, the set of meet is not surprising, as the majority of meet are actually obvious connections between two diseases.

### **Categorification and implication for diagnostic rule out:**

Our construction of subset relations between differential diagnosis can be easily turned into a strict poset relationship if we uses  $\leq$  rather than  $<$ . If we allow for such a simple modification of our project, then our construction for differential diagnosis conveniently



forms a mathematical category. This is due to the fact that any poset forms a thin category.

We introduce both of these definitions below:

**Definition.**<sup>24,25</sup>

A category  $A$  consists of:

1. A collection of objects, denoted  $\text{obj}(A)$
2. For each  $a, b$  in  $\text{obj}(A)$ , a collection of maps, also called arrows or morphism, from  $a$  to  $b$ , denoted  $\text{hom}_A(a, b)$ . Often written as  $\text{hom}(a, b)$ . In other words, per

MacLane:

$$\text{hom}_A(a, b) = \{f \mid f \text{ is an arrow } f: a \rightarrow b \text{ in } A\}$$

3. For each  $a, b, c$  in  $\text{obj}(A)$ , a function  $\text{hom}(b, c) \times \text{hom}(a, b) \rightarrow \text{hom}(a, c)$  called composition.
4. For each element  $a$  of  $\text{obj}(A)$ , an element  $1_A$  in  $\text{hom}(a, a)$ , called identity on  $a$ .

The above data must satisfy the following:

5. Associativity: for each  $f$  in  $\text{hom}(a, b)$  and  $g$  in  $\text{hom}(b, c)$  and  $h$  in  $\text{hom}(c, d)$  then  $(h \circ g) \circ f = h \circ (g \circ f)$
6. Identity: for each  $f$  in  $\text{hom}(A, b)$ ,  $f \circ 1_A = 1_B \circ f$ .

A thin category is a category with at most one morphism. It is also called a posetal category.

**Definition:**<sup>22</sup>

Let  $C, B$  be two categories. A functor is defined by two functions: an object function  $T$  and an arrow function, also written as  $T$ , satisfying the following:

1. Object function  $T$  assigns to each object  $c$  in  $C$  to an object  $Tc$  in  $B$ .
2. Arrow function assigns each arrow  $f$  in  $\text{hom}(c, c')$  in  $C$  to an arrow  $Tf$  in  $\text{hom}(Tc, Tc')$  of  $B$ .
3.  $T(1_c) = 1_{Tc}$
4.  $T(g \circ f) = Tg \circ Tf$ , whenever composition is defined in  $C$  for  $g$  and  $f$ .

Establishing functorial relationships between different categories allows us to describe diagnostic rule outs. For example, consider the case where “headache secondary to TIA” is ruled out by a diagnostic intervention. We can construct a new poset from our existing one by simply taking out “headache secondary to TIA” from all of its elements. (Represented by the notation “\”.) One can show that the new poset constructed through this rule out retains the exact same set/subset relationship.

Diagnostic rule out of “headache secondary to TIA” from our original poset is therefore a functor in the following way 1) the functor maps differential set in the original poset to a differential set without the “headache secondary to TIA” and 2) the functor maps the function  $\leq$  to  $\leq$  in the new poset. That is,  $F(a \leq b) = Fa \leq Fb$ . Notice that  $F(f \cdot g) = F(x < z) = (x \setminus b) \leq (z \setminus b)$  for any  $f: x \rightarrow y$  and  $g: y \rightarrow z$ , where  $b =$  “headache secondary to TIA”. Also  $F(f) \cdot F(g) = (x \setminus b \leq y \setminus b) \leq (y \setminus b \leq z \setminus b) = (x \setminus b) \leq (z \setminus b)$ . Therefore the functor relationship is satisfied.

The importance of being able to construct such a functor lies in the ability for us to write addition as well as diagnostic rule out as a formula. Consider an initial differential diagnosis,  $a$ , we can expand this diagnosis by adding another diagnosis,  $b$ , via join, and then rule out a condition  $C$ . This sequent can be written as  $C(a \sqcup b)$ .

### **Theoretical Conclusion and Future directions:**

Our project provides a potential theoretical foundation for the exploration of orders and hierarchy in clinical science apart from ordering based on pathophysiology. In other words, while ICHD3 classification classifies headache disorders pathophysiologically, our schema establishes a foundation for classification of differential diagnosis based on established mathematical framework.

## References:

1. Scordo KA. Differential diagnosis: correctly putting the pieces of the puzzle together. *AACN Adv Crit Care.*;25:230-6.
2. Nardone DA. Differential diagnosis and heuristics. *JAMA.*;254:2890-1.
3. Zhang P. DiffNet. <http://techfinder.rutgers.edu/tech/DIFFNET>. Accessed October 26, 2021.
4. Zhang P, Berk T. "IHC 2019 Abstracts: Network Analysis of the International Classification of Headache Disorders, 3<sup>rd</sup> Edition" *Cephalalgia* 39:Supplement: 1-337.
5. The International Classification of Headache Disorders, 3<sup>rd</sup> Edition. *Cephalalgia* 2018;38:1-211.
6. Weisstein, Eric W. "Set". [mathworld.wolfram.com](http://mathworld.wolfram.com/Set.html). Retrieved 2020-10-27
7. Weisstein, Eric W. "Subset". [mathworld.wolfram.com](http://mathworld.wolfram.com/Subset.html). Retrieved 2020-10-27
8. Weisstein, Eric W. "Superset". [mathworld.wolfram.com](http://mathworld.wolfram.com/Superset.html). Retrieved 2020-10-27
9. Ashina H, Eigenbrodt AK, Seifert T, Sinclair AJ, Scher AI, Schytz HW, Lee MJ, De Icco R, Finkel AG, Ashina M. Post-traumatic headache attributed to traumatic brain injury: classification, clinical characteristics, and treatment. *Lancet Neurol.*2021;20:460-469.

10. Cheng SJ, Hakkinen I, Zhang P, Roychowdhury S. Paradoxical headache in a case of chronic spontaneous intracranial hypotension and multiple perineural cysts. *Headache*.2021;61:1291-1294.
11. Malhotra K, Liebeskind DS. Imaging of MELAS. *Curr Pain Headache Rep*.2016;20:54.
12. Tran TM, McClelland CM, Lee MS. Diagnosis and Management of Trochleodynia, Trochleitis, and Trochlear Headache. *Front Neurol*.2019;10:361.
13. Evans RW. New daily persistent headache. *Curr Pain Headache Rep*.2003;7:303-7.
14. Purdy A. 19<sup>th</sup> Annual HCNE Boston Fall Headache Symposium. Nov 2, 2019.
15. Gratzter G. Two Problems That Shaped a Century of Lattice Theory. *Notice of the AMS*. 54;6:696-707.
16. Roitman J. *Introduction to Modern Set Theory*. 3<sup>rd</sup> ed. Orthogonal Publishing; 2013.
17. Fong B, Spivak D. *An Invitation to Applied Category Theory: Seven Sketches in Compositionality*. Cambridge University Press: 2019.
18. Arenas FG. Alexandroff Spaces. *Acta Math. Univ. Comenianae*. 1999: 17-25.

19. Zhang, P “Categorical Medicine: A Mathematical Embedding of Clinical Medicine with Applications to Headache Medicine.” OSF Preprints. September 13. doi:10.31219/osf.io/xw6t5.
20. Jongsma, C. Discrete Mathematics: Chapter 7, Posets, Lattices, & Boolean Algebra. 2016: Retrieved from [https://digitalcollections.dordt.edu/faculty\\_work/427](https://digitalcollections.dordt.edu/faculty_work/427) Accessed 10/29/2021
21. Ditor SZ. Cardinality Question Concerning Semilattices of Finite Breadth. Discrete Mathematics 1984(48):47-59
22. Grätzer G. General Lattice Theory. Birkhauser Verlag; 2003.
23. Friedrich Wehrung. Refinement monoids, equidecomposability types, and Boolean inverse semigroups. Springer Verlag, 2188, 2017, Lecture Notes in Mathematics, 978-3-319-61598-1. ff10.1007/978-3-319-61599-8ff. ffhal-01197354v3f
24. Leinster T. Basic Category Theory. Cambridge University Press: 2014.
25. MacLane S. Category Theory for the Working Mathematician. Springer: 1971.

Table 1a. A list of Lower Sets

1. acute headache attributed to traumatic injury to the head
2. acute headache or facial or neck pain attributed to cervical carotid or vertebral artery dissection
3. calcitonin gene related peptide (cgrp) induced headache
4. cervicogenic headache
5. chronic cluster headache
6. chronic tension type headache
7. cluster headache
8. cold stimulus headache
9. frequent episodic tension type headache
10. headache attributed to a substance or its withdrawal
11. headache attributed to cranial and/or cervical vascular disorder
12. headache attributed to disorder of homoeostasis
13. headache attributed to epileptic seizure
14. headache attributed to increased cerebrospinal fluid (csf) pressure
15. headache attributed to infection
16. headache attributed to low cerebrospinal fluid (csf) pressure
17. headache attributed to non traumatic intracranial haemorrhage
18. headache attributed to non vascular intracranial disorder
19. headache attributed to psychiatric disorder
20. headache attributed to reversible cerebral vasoconstriction syndrome (rcvs)
21. headache attributed to spontaneous intracranial hypotension
22. headache attributed to trauma or injury to the head and/or neck
23. headache attributed to use of or exposure to a substance
24. headache or facial pain attributed to disorder of the cranium neck eyes ears nose sinuses teeth mouth or other facial or cervical structure
25. hemicrania continua
26. hemiplegic migraine
27. histamine induced headache
28. hypnic headache
29. infrequent episodic tension type headache
30. medication overuse headache (moh)
31. migraine
32. migraine with aura
33. migraine without aura
34. nitric oxide (no) donor induced headache
35. non menstrual migraine without aura
36. other headache disorders
37. other primary headache disorders
38. painful lesions of the cranial nerves and other facial pain
39. persistent headache attributed to past ischaemic stroke (cerebral infarction)
40. persistent headache attributed to past non traumatic intracranial haemorrhage
41. persistent headache attributed to traumatic injury to the head

42. primary cough headache
43. primary exercise headache
44. primary headache associated with sexual activity
45. primary stabbing headache
46. short lasting unilateral neuralgiform headache attacks
47. short lasting unilateral neuralgiform headache attacks with conjunctival injection and tearing (sunct)
48. tension type headache (alternative criteria)
49. tension type headache (tth)
50. trigeminal autonomic cephalalgias (tacs)
51. trigeminal neuralgia



Table 1b: A list of Singletons

1. acute headache attributed to moderate or severe traumatic injury to the head
2. angiography headache
3. caffeine withdrawal headache
4. cardiac cephalalgia
5. chronic migraine
6. chronic paroxysmal hemicrania
7. dialysis headache
8. diving headache
9. external compression headache
10. headache attributed to an intracranial endarterial procedure
11. headache attributed to arteriovenous malformation (avm)
12. headache attributed to cavernous angioma
13. headache attributed to cerebral autosomal dominant arteriopathy with subcortical infarcts and leukoencephalopathy (cadasil)
14. headache attributed to cerebral venous thrombosis (cvt)
15. headache attributed to chiari malformation type i (cm1)
16. headache attributed to encephalotrigeminal or leptomeningeal angiomatosis (sturge weber syndrome)
17. headache attributed to fasting
18. headache attributed to human immunodeficiency virus (hiv) infection
19. headache attributed to hypothalamic or pituitary hyper or hyposecretion
20. headache attributed to hypothyroidism
21. headache attributed to idiopathic intracranial hypertension (iih)
22. headache attributed to ingestion or inhalation of a cold stimulus
23. headache attributed to intracranial hypertension secondary to metabolic toxic or hormonal cause
24. headache attributed to long term use of non headache medication
25. headache attributed to mitochondrial encephalopathy lactic acidosis and stroke like episodes (melas)
26. headache attributed to moyamoya angiopathy (mma)
27. headache attributed to other chronic intracranial vasculopathy
28. headache attributed to transient ischaemic attack (tia)
29. migraine aura triggered seizure
30. new daily persistent headache (ndph)
31. oestrogen withdrawal headache
32. persistent headache attributed to craniotomy
33. persistent headache attributed to moderate or severe traumatic injury to the head
34. phosphodiesterase (pde) inhibitor induced headache
35. primary thunderclap headache
36. probable migraine
37. probable tension type headache
38. recurrent painful ophthalmoplegic neuropathy

39. status migrainosus
40. syndrome of transient headache and neurological deficits with cerebrospinal fluid lymphocytosis (handl)
41. triptan overuse headache
42. trochlear headache

- 1) acute headache attributed to traumatic injury to the head
  - a) acute headache attributed to mild traumatic injury to the head
  - b) acute headache attributed to whiplash
  - c) delayed onset acute headache attributed to mild traumatic injury to the head
  - d) delayed onset acute headache attributed to moderate or severe traumatic injury to the head
- 2) acute headache or facial or neck pain attributed to cervical carotid or vertebral artery dissection
  - a) persistent headache or facial or neck pain attributed to past cervical carotid or vertebral artery dissection
    - i) headache or facial or neck pain attributed to cervical carotid or vertebral artery dissection
- 3) calcitonin gene related peptide (cgrp) induced headache
  - a) delayed cgrp induced headache
  - b) immediate cgrp induced headache
- 4) cervicogenic headache
  - a) headache attributed to cervical myofascial pain
  - b) headache attributed to upper cervical radiculopathy
- 5) chronic cluster headache
  - a) episodic cluster headache
- 6) chronic tension type headache
  - a) chronic tension type headache not associated with pericranial tenderness
- 7) cluster headache
  - a) episodic cluster headache
- 8) cold stimulus headache
  - a) headache attributed to external application of a cold stimulus
  - b) probable cold stimulus headache
    - i) headache probably attributed to external application of a cold stimulus
    - ii) headache probably attributed to ingestion or inhalation of a cold stimulus
- 9) frequent episodic tension type headache
  - a) frequent episodic tension type headache not associated with pericranial tenderness
- 10) headache attributed to a substance or its withdrawal
  - a) carbon monoxide (co) induced headache
  - b) cocaine induced headache
  - c) delayed alcohol induced headache
    - i) alcohol induced headache
    - ii) immediate alcohol induced headache
  - d) delayed cgrp induced headache
  - e) delayed histamine induced headache
  - f) delayed no donor induced headache
  - g) headache attributed to exogenous acute pressor agent
  - h) headache attributed to occasional use of non headache medication
  - i) headache attributed to substance withdrawal

- i) headache attributed to withdrawal from chronic use of other substance
  - ii) opioid withdrawal headache
  - j) headache attributed to use of or exposure to other substance
  - k) immediate cgrp induced headache
  - l) immediate histamine induced headache
  - m) immediate no donor induced headache
  - n) medication overuse headache attributed to multiple drug classes not individually overused
    - i) combination analgesic overuse headache
    - ii) ergotamine overuse headache
    - iii) opioid overuse headache
  - o) medication overuse headache attributed to other medication
  - p) medication overuse headache attributed to unspecified or unverified overuse of multiple drug classes
  - q) non opioid analgesic overuse headache
    - i) acetylsalicylic acid overuse headache
    - ii) non steroidal anti inflammatory drug (nsaid) overuse headache
    - iii) other non opioid analgesic overuse headache
    - iv) paracetamol (acetaminophen) overuse headache
  - r) persistent headache attributed to past use of or exposure to a substance
- 11) headache attributed to cranial and/or cervical vascular disorder
- a) acute headache attributed to non traumatic acute subdural haemorrhage (asdh)
  - b) acute headache attributed to non traumatic intracerebral haemorrhage
  - c) acute headache attributed to non traumatic subarachnoid haemorrhage (sah)
  - d) headache and/or migraine like aura attributed to chronic intracranial vasculopathy
    - i) headache attributed to syndrome of retinal vasculopathy with cerebral leukoencephalopathy and systemic manifestations (rvclsm)
  - e) headache attributed to arteritis
    - i) headache attributed to giant cell arteritis (gca)
    - ii) headache attributed to primary angiitis of the central nervous system (pacns)
    - iii) headache attributed to secondary angiitis of the central nervous system (sacns)
  - f) headache attributed to cerebral ischaemic event
    - i) acute headache attributed to ischaemic stroke (cerebral infarction)
    - ii) headache attributed to ischaemic stroke (cerebral infarction)
  - g) headache attributed to cervical carotid or vertebral artery disorder
    - i) headache attributed to carotid or vertebral angioplasty or stenting
    - ii) headache or facial or neck pain attributed to cervical carotid or vertebral artery dissection
    - iii) post endarterectomy headache
  - h) headache attributed to cranial venous disorder
    - i) headache attributed to cranial venous sinus stenting
  - i) headache attributed to intracranial artery dissection
  - j) headache attributed to other acute intracranial arterial disorder
    - i) acute headache attributed to reversible cerebral vasoconstriction syndrome (rcvs)
      - (1) acute headache probably attributed to reversible cerebral vasoconstriction syndrome (rcvs)
      - (2) persistent headache attributed to past reversible cerebral vasoconstriction syndrome (rcvs)
  - k) headache attributed to pituitary apoplexy

- l) headache attributed to unruptured vascular malformation
    - i) headache attributed to dural arteriovenous fistula (davf)
    - ii) headache attributed to unruptured saccular aneurysm
  - m) migraine like aura attributed to cerebral amyloid angiopathy (caa)
  - n) persistent headache attributed to past cranial and/or cervical vascular disorder
  - o) persistent headache attributed to past non traumatic acute subdural haemorrhage
  - p) persistent headache attributed to past non traumatic intracerebral haemorrhage
  - q) persistent headache attributed to past non traumatic subarachnoid haemorrhage
- 12) headache attributed to disorder of homeostasis
- a) head and/or neck pain attributed to orthostatic (postural) hypotension
  - b) headache attributed to arterial hypertension
    - i) headache attributed to autonomic dysreflexia
    - ii) headache attributed to pheochromocytoma
      - (1) headache attributed to hypertensive crisis without hypertensive encephalopathy
      - (2) headache attributed to hypertensive encephalopathy
    - iii) headache attributed to pre eclampsia or eclampsia
  - c) headache attributed to hypoxia and/or hypercapnia
    - i) headache attributed to aeroplane travel
    - ii) high altitude headache
    - iii) sleep apnoea headache
  - d) headache attributed to other disorder of homeostasis
    - i) headache attributed to other metabolic or systemic disorder
    - ii) headache attributed to travel in space
  - e) persistent headache attributed to past disorder of homeostasis
- 13) headache attributed to epileptic seizure ictal epileptic headache
- a) ictal epileptic headache
  - b) post electroconvulsive therapy (ect) headache
  - c) post ictal headache
- 14) headache attributed to increased cerebrospinal fluid (csf) pressure
- a) headache attributed to intracranial hypertension secondary to chromosomal disorder
  - b) headache attributed to intracranial hypertension secondary to hydrocephalus
- 15) headache attributed to infection
- a) headache attributed to intracranial infection
    - i) headache attributed to bacterial meningitis or meningoencephalitis
      - (1) acute headache attributed to bacterial meningitis or meningoencephalitis
      - (2) chronic headache attributed to bacterial meningitis or meningoencephalitis
      - (3) persistent headache attributed to past bacterial meningitis or meningoencephalitis
    - ii) headache attributed to intracranial fungal or other parasitic infection
      - (1) acute headache attributed to intracranial fungal or other parasitic infection

- (2) chronic headache attributed to intracranial fungal or other parasitic infection
      - (3) persistent headache attributed to past intracranial fungal or other parasitic infection
    - iii) headache attributed to localized brain infection
    - iv) headache attributed to viral meningitis or encephalitis
      - (1) headache attributed to viral encephalitis
      - (2) headache attributed to viral meningitis
  - b) headache attributed to systemic infection
    - i) headache attributed to other systemic infection
      - (1) acute headache attributed to other systemic infection
      - (2) chronic headache attributed to other systemic infection
    - ii) headache attributed to systemic bacterial infection
      - (1) acute headache attributed to systemic bacterial infection
      - (2) chronic headache attributed to systemic bacterial infection
    - iii) headache attributed to systemic viral infection
      - (1) acute headache attributed to systemic viral infection
      - (2) chronic headache attributed to systemic viral infection
- 16) headache attributed to low cerebrospinal fluid (csf) pressure
- a) post dural puncture headache
- 17) headache attributed to non traumatic intracranial haemorrhage
- a) persistent headache attributed to past non traumatic acute subdural haemorrhage
  - b) persistent headache attributed to past non traumatic intracerebral haemorrhage
  - c) persistent headache attributed to past non traumatic subarachnoid haemorrhage
- 18) headache attributed to non vascular intracranial disorder
- a) cerebrospinal fluid (csf) fistula headache
    - i) headache attributed to intrathecal injection
  - b) headache attributed to intracranial hypertension secondary to chromosomal disorder
  - c) headache attributed to intracranial hypertension secondary to hydrocephalus
  - d) headache attributed to intracranial neoplasia
    - i) headache attributed to carcinomatous meningitis
    - ii) headache attributed to colloid cyst of the third ventricle
  - e) headache attributed to intracranial neoplasm
    - i) headache attributed to colloid cyst of the third ventricle
  - f) headache attributed to non infectious inflammatory intracranial disease
    - i) headache attributed to aseptic (non infectious) meningitis
    - ii) headache attributed to lymphocytic hypophysitis
    - iii) headache attributed to neurosarcoidosis
    - iv) headache attributed to other non infectious inflammatory intracranial disease
  - g) headache attributed to other non vascular intracranial disorder
  - h) ictal epileptic headache
  - i) persistent headache attributed to past non vascular intracranial disorder
  - j) post dural puncture headache
  - k) post electroconvulsive therapy (ect) headache
  - l) post ictal headache

- 19) headache attributed to psychiatric disorder
  - a) headache attributed to depressive disorder
  - b) headache attributed to generalized anxiety disorder
  - c) headache attributed to panic disorder
  - d) headache attributed to post traumatic stress disorder (ptsd)
  - e) headache attributed to psychotic disorder
  - f) headache attributed to separation anxiety disorder
  - g) headache attributed to social anxiety disorder (social phobia)
  - h) headache attributed to somatization disorder
  - i) headache attributed to specific phobia
- 20) headache attributed to reversible cerebral vasoconstriction syndrome (rcvs)
  - a) acute headache attributed to reversible cerebral vasoconstriction syndrome (rcvs)
  - b) persistent headache attributed to past reversible cerebral vasoconstriction syndrome (rcvs)
- 21) headache attributed to spontaneous intracranial hypotension
  - a) post dural puncture headache
- 22) headache attributed to trauma or injury to the head and/or neck
  - a) acute headache attributed to craniotomy
  - b) acute headache attributed to mild traumatic injury to the head
  - c) acute headache attributed to other trauma or injury to the head and/or neck
  - d) acute headache attributed to whiplash
  - e) delayed onset acute headache attributed to mild traumatic injury to the head
  - f) delayed onset acute headache attributed to moderate or severe traumatic injury to the head
  - g) delayed onset persistent headache attributed to mild traumatic injury to the head
  - h) delayed onset persistent headache attributed to moderate or severe traumatic injury to the head
  - i) headache attributed to radiosurgery of the brain
  - j) persistent headache attributed to mild traumatic injury to the head
  - k) persistent headache attributed to other trauma or injury to the head and/or neck
- 23) headache attributed to use of or exposure to a substance
  - a) carbon monoxide (co) induced headache
  - b) cocaine induced headache
  - c) delayed alcohol induced headache
    - i) alcohol induced headache
    - ii) immediate alcohol induced headache
  - d) delayed cgrp induced headache
  - e) delayed histamine induced headache
  - f) delayed no donor induced headache
  - g) headache attributed to exogenous acute pressor agent
  - h) headache attributed to occasional use of non headache medication
  - i) immediate cgrp induced headache
  - j) immediate histamine induced headache
  - k) immediate no donor induced headache

- 24) headache or facial pain attributed to disorder of the cranium neck eyes ears nose sinuses teeth mouth or other facial or cervical structure
  - a) head or facial pain attributed to inflammation of the stylohyoid ligament
  - b) headache attributed to disorder of cranial bone
  - c) headache attributed to disorder of the ears
  - d) headache attributed to disorder of the eyes
    - i) headache attributed to acute angle closure glaucoma
    - ii) headache attributed to ocular inflammatory disorder
    - iii) headache attributed to refractive error
  - e) headache attributed to disorder of the neck
    - i) headache attributed to cervical myofascial pain
    - ii) headache attributed to craniocervical dystonia
    - iii) headache attributed to retropharyngeal tendonitis
    - iv) headache attributed to upper cervical radiculopathy
  - f) headache attributed to disorder of the nose or paranasal sinuses
    - i) headache attributed to acute rhinosinusitis
    - ii) headache attributed to chronic or recurring rhinosinusitis
    - iii) headache attributed to disorder of the nasal mucosa turbinates or septum
  - g) headache attributed to disorder of the teeth
  - h) headache attributed to heterophoria or heterotropia
  - i) headache attributed to temporomandibular disorder (tmd)
  - j) headache or facial pain attributed to other disorder of cranium neck eyes ears nose sinuses teeth mouth or other facial or cervical structure
- 25) hemicrania continua
  - a) hemicrania continua remitting subtype
  - b) hemicrania continua unremitting subtype
- 26) hemiplegic migraine
  - a) familial hemiplegic migraine (fhm)
    - i) familial hemiplegic migraine other loci
    - ii) familial hemiplegic migraine type 2 (fhm2)
    - iii) familial hemiplegic migraine type 3 (fhm3)
  - b) familial hemiplegic migraine type 1 (fhm1)
  - c) sporadic hemiplegic migraine (shm)
- 27) histamine induced headache
  - a) delayed histamine induced headache
  - b) immediate histamine induced headache
- 28) hypnic headache
  - a) probable hypnic headache
- 29) infrequent episodic tension type headache
  - a) infrequent episodic tension type headache not associated with pericranial tenderness
- 30) medication overuse headache (moh)
  - a) medication overuse headache attributed to multiple drug classes not individually overused
    - i) combination analgesic overuse headache
    - ii) ergotamine overuse headache
    - iii) opioid overuse headache
  - b) medication overuse headache attributed to other medication



- c) medication overuse headache attributed to unspecified or unverified overuse of multiple drug classes
  - d) non opioid analgesic overuse headache
    - i) acetylsalicylic acid overuse headache
    - ii) non steroidal anti inflammatory drug (nsaid) overuse headache
    - iii) other non opioid analgesic overuse headache
    - iv) paracetamol (acetaminophen) overuse headache
- 31) migraine
- a) benign paroxysmal torticollis
  - b) chronic migraine (alternative criteria)
  - c) chronic migraine with continuous pain
  - d) chronic migraine with pain free periods
  - e) complications of migraine
  - f) episodic syndromes that may be associated with migraine
    - i) abdominal migraine
    - ii) alternating hemiplegia of childhood
    - iii) benign paroxysmal vertigo
    - iv) infantile colic
    - v) recurrent gastrointestinal disturbance
      - (1) cyclical vomiting syndrome
  - g) familial hemiplegic migraine (fhm)
    - i) familial hemiplegic migraine other loci
    - ii) familial hemiplegic migraine type 2 (fhm2)
    - iii) familial hemiplegic migraine type 3 (fhm3)
  - h) menstrually related migraine without aura
  - i) migraine aura status
  - j) migraine with brainstem aura
  - k) migraine with typical aura
  - l) migrainous infarction
  - m) non menstrual migraine with aura
    - i) menstrually related migraine with aura
    - ii) pure menstrual migraine with aura
  - n) persistent aura without infarction
  - o) probable migraine with aura
  - p) probable migraine without aura
  - q) pure menstrual migraine without aura
  - r) retinal migraine
  - s) typical aura with headache
  - t) typical aura without headache
  - u) vestibular migraine
  - v) visual snow
- 32) migraine with aura
- a) familial hemiplegic migraine (fhm)
    - (1) familial hemiplegic migraine other loci
    - (2) familial hemiplegic migraine type 2 (fhm2)
    - (3) familial hemiplegic migraine type 3 (fhm3)
  - b) infantile colic
  - c) migraine with brainstem aura
  - d) migraine with typical aura
  - e) non menstrual migraine with aura
    - i) menstrually related migraine with aura
    - ii) pure menstrual migraine with aura
  - f) probable migraine with aura

- g) retinal migraine
  - h) typical aura with headache
  - i) typical aura without headache
- 33) migraine without aura
- a) infantile colic
  - b) menstrually related migraine without aura
  - c) non menstrual migraine with aura
    - i) menstrually related migraine with aura
    - ii) pure menstrual migraine with aura
  - d) pure menstrual migraine without aura
- 34) nitric oxide (no) donor induced
- a) headache attributed to use of or exposure to other substance
  - b) immediate no donor induced headache
- 35) non menstrual migraine without aura
- a) menstrually related migraine without aura
  - b) pure menstrual migraine without aura
- 36) other headache disorders
- a) headache not elsewhere classified
  - b) headache unspecified
- 37) other primary headache disorders
- a) epicrania fugax
  - b) external pressure headache
    - i) external traction headache
    - ii) probable external pressure headache
      - (1) probable external compression headache
      - (2) probable external traction headache
  - c) headache attributed to external application of a cold stimulus
  - d) nummular headache
  - e) probable cold stimulus headache
    - i) headache probably attributed to external application of a cold stimulus
    - ii) headache probably attributed to ingestion or inhalation of a cold stimulus
  - f) probable hypnic headache
  - g) probable new daily persistent headache
  - h) probable nummular headache
  - i) probable primary cough headache
  - j) probable primary exercise headache
  - k) probable primary headache associated with sexual activity
  - l) probable primary stabbing headache
- 38) painful lesions of the cranial nerves and other facial pain
- a) glossopharyngeal neuralgia
    - i) classical glossopharyngeal neuralgia
    - ii) idiopathic glossopharyngeal neuralgia
    - iii) secondary glossopharyngeal neuralgia
  - b) headache attributed to ischaemic ocular motor nerve palsy
  - c) neck tongue syndrome
  - d) occipital neuralgia
  - e) pain attributed to a lesion or disease of nervus intermedius
    - i) nervus intermedius neuralgia

- (1) classical nervus intermedius neuralgia
  - (2) idiopathic nervus intermedius neuralgia
  - ii) painful nervus intermedius neuropathy
    - (1) idiopathic painful nervus intermedius neuropathy
    - (2) painful nervus intermedius neuropathy attributed to other disorder
    - (3) post herpetic neuralgia of nervus intermedius
  - iii) painful nervus intermedius neuropathy attributed to herpes zoster
    - (1) post herpetic neuralgia of nervus intermedius
  - iv) secondary nervus intermedius neuralgia
    - (1) idiopathic nervus intermedius neuralgia
  - f) pain attributed to a lesion or disease of the glossopharyngeal nerve
    - i) classical glossopharyngeal neuralgia
    - ii) idiopathic glossopharyngeal neuralgia
    - iii) painful glossopharyngeal neuropathy
      - (1) idiopathic painful glossopharyngeal neuropathy
      - (2) painful glossopharyngeal neuropathy attributed to a known cause
    - iv) secondary glossopharyngeal neuralgia
  - g) pain attributed to a lesion or disease of the trigeminal nerve
    - i) burning mouth syndrome (bms)
    - ii) central neuropathic pain
    - iii) central neuropathic pain attributed to multiple sclerosis (ms)
    - iv) classical trigeminal neuralgia
      - (1) classical trigeminal neuralgia purely paroxysmal
      - (2) classical trigeminal neuralgia with concomitant continuous pain
    - v) idiopathic trigeminal neuralgia
      - (1) idiopathic trigeminal neuralgia with concomitant continuous pain
    - vi) painful post traumatic trigeminal
      - (1) neuropathy persistent idiopathic facial pain (pifp)
    - vii) painful trigeminal neuropathy
      - (1) idiopathic painful trigeminal neuropathy
      - (2) painful trigeminal neuropathy attributed to herpes zoster
      - (3) trigeminal post herpetic neuralgia
    - viii) painful trigeminal neuropathy attributed to other disorder
    - ix) secondary trigeminal neuralgia
      - (1) trigeminal neuralgia attributed to other cause
      - (2) trigeminal neuralgia attributed to space occupying lesion
    - x) trigeminal neuralgia attributed to multiple sclerosis
  - h) painful optic neuritis
  - i) paratrigeminal oculosympathetic (raeder s) syndrome
  - j) tolosa hunt syndrome
- 39) persistent headache attributed to past ischaemic stroke (cerebral infarction)  
a) acute headache attributed to ischaemic stroke (cerebral infarction)  
b) headache attributed to ischaemic stroke (cerebral infarction)
- 40) persistent headache attributed to past non traumatic intracranial haemorrhage  
a) persistent headache attributed to past non traumatic acute subdural haemorrhage

- b) persistent headache attributed to past non traumatic intracerebral haemorrhage
  - c) persistent headache attributed to past non traumatic subarachnoid haemorrhage
- 41) persistent headache attributed to traumatic injury to the head
- a) delayed onset persistent headache attributed to mild traumatic injury to the head
  - b) delayed onset persistent headache attributed to moderate or severe traumatic injury to the head
  - c) persistent headache attributed to mild traumatic injury to the head
  - d) persistent headache attributed to whiplash
- 42) primary cough headache
- a) probable primary cough headache
- 43) primary exercise headache
- a) probable primary exercise headache
- 44) primary headache associated with sexual activity
- a) probable primary headache associated with sexual activity
- 45) primary stabbing headache
- a) probable primary stabbing headache
- 46) short lasting unilateral neuralgiform headache attacks
- a) chronic sunct
  - b) episodic sunct
  - c) short lasting unilateral neuralgiform headache attacks with cranial autonomic symptoms (suna)
    - i) chronic suna
    - ii) episodic suna
- 47) short lasting unilateral neuralgiform headache attacks with conjunctival injection and tearing (sunct)
- a) episodic sunct
- 48) tension type headache (alternative criteria)
- a) chronic tension type headache (alternative criteria)
  - b) frequent episodic tension type headache (alternative criteria)
  - c) infrequent episodic tension type headache (alternative criteria)
- 49) tension type headache (tth)
- a) chronic tension type headache associated with pericranial tenderness
  - b) chronic tension type headache not associated with pericranial tenderness
  - c) frequent episodic tension type headache associated with pericranial tenderness
  - d) frequent episodic tension type headache not associated with pericranial tenderness
  - e) infrequent episodic tension type headache associated with pericranial tenderness
  - f) infrequent episodic tension type headache not associated with pericranial tenderness
  - g) probable chronic tension type headache
  - h) probable frequent episodic tension type headache

- i) probable infrequent episodic tension type headache
- 50) trigeminal autonomic cephalalgias (tacs)
- a) chronic sunct
  - b) cluster headache (alternative criteria)
  - c) episodic cluster headache
  - d) episodic sunct
  - e) hemicrania continua (alternative criteria)
  - f) hemicrania continua remitting subtype
  - g) hemicrania continua unremitting subtype
  - h) paroxysmal hemicrania
  - i) paroxysmal hemicrania (alternative criteria)
  - j) probable trigeminal autonomic cephalalgia
    - i) probable cluster headache
    - ii) probable hemicrania continua
    - iii) probable paroxysmal hemicrania
    - iv) probable short lasting unilateral neuralgiform headache attacks
  - k) short lasting unilateral neuralgiform headache attacks (alternative criteria)
  - l) short lasting unilateral neuralgiform headache attacks with cranial autonomic symptoms (suna)
    - i) chronic suna
    - ii) episodic suna
  - m) undifferentiated trigeminal autonomic cephalalgia
- 51) trigeminal neuralgia
- a) classical trigeminal neuralgia
    - i) classical trigeminal neuralgia purely paroxysmal
    - ii) classical trigeminal neuralgia with concomitant continuous pain
  - b) idiopathic trigeminal neuralgia idiopathic
    - i) trigeminal neuralgia with concomitant continuous pain
  - c) trigeminal neuralgia attributed to other cause
  - d) trigeminal neuralgia attributed to space occupying lesion

Table 3: The inversions

1. acute headache attributed to reversible cerebral vasoconstriction syndrome (rcvs),persistent headache attributed to past reversible cerebral vasoconstriction syndrome (rcvs)
2. acute headache or facial or neck pain attributed to cervical carotid or vertebral artery dissection,headache or facial or neck pain attributed to cervical carotid or vertebral artery dissection
3. acute headache or facial or neck pain attributed to cervical carotid or vertebral artery dissection,persistent headache or facial or neck pain attributed to past cervical carotid or vertebral artery dissection
4. cerebrospinal fluid (csf) fistula headache,headache attributed to intrathecal injection
5. delayed alcohol induced headache,alcohol induced headache
6. delayed alcohol induced headache,immediate alcohol induced headache
7. migraine with aura,infantile colic
8. migraine without aura,infantile colic
9. painful post traumatic trigeminal neuropathy,persistent idiopathic facial pain (pifp)
10. persistent headache attributed to past ischaemic stroke (cerebral infarction),headache attributed to ischaemic stroke (cerebral infarction)
11. persistent headache or facial or neck pain attributed to past cervical carotid or vertebral artery dissection,headache or facial or neck pain attributed to cervical carotid or vertebral artery dissection
12. secondary nervus intermedius neuralgia,idiopathic nervus intermedius neuralgia

Table 4. All possible “lower bound”

acute headache attributed to traumatic injury to the head and headache attributed to trauma or injury to the head and/or neck:

- acute headache attributed to mild traumatic injury to the head
- acute headache attributed to whiplash
- delayed onset acute headache attributed to mild traumatic injury to the head
- delayed onset acute headache attributed to moderate or severe traumatic injury to the head

calcitonin gene related peptide (cgrp) induced headache and headache attributed to a substance or its withdrawal:

- delayed cgrp induced headache
- immediate cgrp induced headache

calcitonin gene related peptide (cgrp) induced headache and headache attributed to use of or exposure to a substance:

- delayed cgrp induced headache
- immediate cgrp induced headache

cervicogenic headache and headache attributed to disorder of the neck:

- headache attributed to cervical myofascial pain
- headache attributed to upper cervical radiculopathy

chronic cluster headache and cluster headache:

- episodic cluster headache

chronic cluster headache and trigeminal autonomic cephalalgias (tacs):

- episodic cluster headache

chronic tension type headache and tension type headache (tth):

- chronic tension type headache not associated with pericranial tenderness

cluster headache and trigeminal autonomic cephalalgias (tacs):

- episodic cluster headache

cold stimulus headache and other primary headache disorders:

- headache attributed to external application of a cold stimulus
- probable cold stimulus headache

episodic syndromes that may be associated with migraine and migraine with aura:

- infantile colic

episodic syndromes that may be associated with migraine and migraine without aura:

- infantile colic

frequent episodic tension type headache and tension type headache (tth):

- frequent episodic tension type headache not associated with pericranial tenderness

glossopharyngeal neuralgia and pain attributed to a lesion or disease of the glossopharyngeal nerve:

- classical glossopharyngeal neuralgia
- idiopathic glossopharyngeal neuralgia
- secondary glossopharyngeal neuralgia

headache attributed to a substance or its withdrawal and headache attributed to use of or exposure to a substance:

- carbon monoxide (co) induced headache
- cocaine induced headache
- delayed alcohol induced headache
- delayed cgrp induced headache
- delayed histamine induced headache
- delayed no donor induced headache
- headache attributed to exogenous acute pressor agent
- headache attributed to occasional use of non headache medication
- immediate cgrp induced headache
- immediate histamine induced headache
- immediate no donor induced headache

headache attributed to a substance or its withdrawal and histamine induced headache:

- delayed histamine induced headache
- immediate histamine induced headache



headache attributed to a substance or its withdrawal and medication overuse  
headache (moh):

- medication overuse headache attributed to multiple drug classes not individually overused
- medication overuse headache attributed to other medication
- medication overuse headache attributed to unspecified or unverified overuse of multiple drug classes
- non opioid analgesic overuse headache

headache attributed to a substance or its withdrawal and nitric oxide (no) donor induced headache:

- headache attributed to use of or exposure to other substance
- immediate no donor induced headache

headache attributed to cerebral ischaemic event and persistent headache attributed to past ischaemic stroke (cerebral infarction):

- acute headache attributed to ischaemic stroke (cerebral infarction)
- headache attributed to ischaemic stroke (cerebral infarction)

headache attributed to cervical carotid or vertebral artery disorder and persistent headache or facial or neck pain attributed to past cervical carotid or vertebral artery dissection:

- headache or facial or neck pain attributed to cervical carotid or vertebral artery dissection

headache attributed to cranial and/or cervical vascular disorder and headache attributed to non traumatic intracranial haemorrhage:

- persistent headache attributed to past non traumatic acute subdural haemorrhage
- persistent headache attributed to past non traumatic intracerebral haemorrhage
- persistent headache attributed to past non traumatic subarachnoid haemorrhage

headache attributed to cranial and/or cervical vascular disorder and persistent headache attributed to past non traumatic intracranial haemorrhage:

- persistent headache attributed to past non traumatic acute subdural haemorrhage

- persistent headache attributed to past non traumatic intracerebral haemorrhage
- persistent headache attributed to past non traumatic subarachnoid haemorrhage

headache attributed to epileptic seizure and headache attributed to non vascular intracranial disorder:

- ictal epileptic headache
- post electroconvulsive therapy (ect) headache
- post ictal headache

headache attributed to increased cerebrospinal fluid (csf) pressure and headache attributed to non vascular intracranial disorder:

- headache attributed to intracranial hypertension secondary to chromosomal disorder
- headache attributed to intracranial hypertension secondary to hydrocephalus

headache attributed to intracranial neoplasia and headache attributed to intracranial neoplasm:

- headache attributed to colloid cyst of the third ventricle

headache attributed to low cerebrospinal fluid (csf) pressure and headache attributed to non vascular intracranial disorder:

- post dural puncture headache

headache attributed to low cerebrospinal fluid (csf) pressure and headache attributed to spontaneous intracranial hypotension:

- post dural puncture headache

headache attributed to non traumatic intracranial haemorrhage and persistent headache attributed to past non traumatic intracranial haemorrhage:

- persistent headache attributed to past non traumatic acute subdural haemorrhage
- persistent headache attributed to past non traumatic intracerebral haemorrhage
- persistent headache attributed to past non traumatic subarachnoid haemorrhage

headache attributed to non vascular intracranial disorder and headache attributed to spontaneous intracranial hypotension:

- post dural puncture headache

headache attributed to other acute intracranial arterial disorder and headache attributed to reversible cerebral vasoconstriction syndrome (rcvs):

- acute headache attributed to reversible cerebral vasoconstriction syndrome (rcvs)

headache attributed to trauma or injury to the head and/or neck and persistent headache attributed to traumatic injury to the head:

- delayed onset persistent headache attributed to mild traumatic injury to the head
- delayed onset persistent headache attributed to moderate or severe traumatic injury to the head
- persistent headache attributed to mild traumatic injury to the head

headache attributed to use of or exposure to a substance and histamine induced headache:

- delayed histamine induced headache
- immediate histamine induced headache

headache attributed to use of or exposure to a substance and nitric oxide (no) donor induced headache:

- immediate no donor induced headache

hemicrania continua and trigeminal autonomic cephalalgias (tacs):

- hemicrania continua remitting subtype
- hemicrania continua unremitting subtype

hemiplegic migraine and migraine:

- familial hemiplegic migraine (fhm)

hemiplegic migraine and migraine with aura:

- familial hemiplegic migraine (fhm)

hypnic headache and other primary headache disorders:

- probable hypnic headache

infrequent episodic tension type headache and tension type headache (tth):

- infrequent episodic tension type headache not associated with pericranial tenderness

migraine and migraine with aura:

- familial hemiplegic migraine (fhm)
- migraine with brainstem aura
- migraine with typical aura
- non menstrual migraine with aura
- probable migraine with aura
- retinal migraine
- typical aura with headache
- typical aura without headache

migraine and migraine without aura:

- menstrually related migraine without aura
- non menstrual migraine with aura
- pure menstrual migraine without aura

migraine and non menstrual migraine without aura:

- menstrually related migraine without aura
- pure menstrual migraine without aura

migraine with aura and migraine without aura:

- infantile colic
- non menstrual migraine with aura

migraine without aura and non menstrual migraine without aura:

- menstrually related migraine without aura
- pure menstrual migraine without aura

nervus intermedius neuralgia and secondary nervus intermedius neuralgia:

- idiopathic nervus intermedius neuralgia

other primary headache disorders and primary cough headache:

- probable primary cough headache

other primary headache disorders and primary exercise headache:

- probable primary exercise headache

other primary headache disorders and primary headache associated with sexual activity:

- probable primary headache associated with sexual activity

other primary headache disorders and primary stabbing headache:

- probable primary stabbing headache

pain attributed to a lesion or disease of the trigeminal nerve and trigeminal neuralgia:

- classical trigeminal neuralgia
- idiopathic trigeminal neuralgia

painful nervus intermedius neuropathy and painful nervus intermedius neuropathy attributed to herpes zoster:

- post herpetic neuralgia of nervus intermedius

secondary trigeminal neuralgia and trigeminal neuralgia:

- trigeminal neuralgia attributed to other cause
- trigeminal neuralgia attributed to space occupying lesion

short lasting unilateral neuralgiform headache attacks and short lasting unilateral neuralgiform headache attacks with conjunctival injection and tearing (sunct):

- episodic sunct

short lasting unilateral neuralgiform headache attacks and trigeminal autonomic cephalalgias (tacs):

- chronic sunct
- episodic sunct
- short lasting unilateral neuralgiform headache attacks with cranial autonomic symptoms (suna)

short lasting unilateral neuralgiform headache attacks with conjunctival injection and tearing (sunct) and trigeminal autonomic cephalalgias (tacs):

- episodic sunct

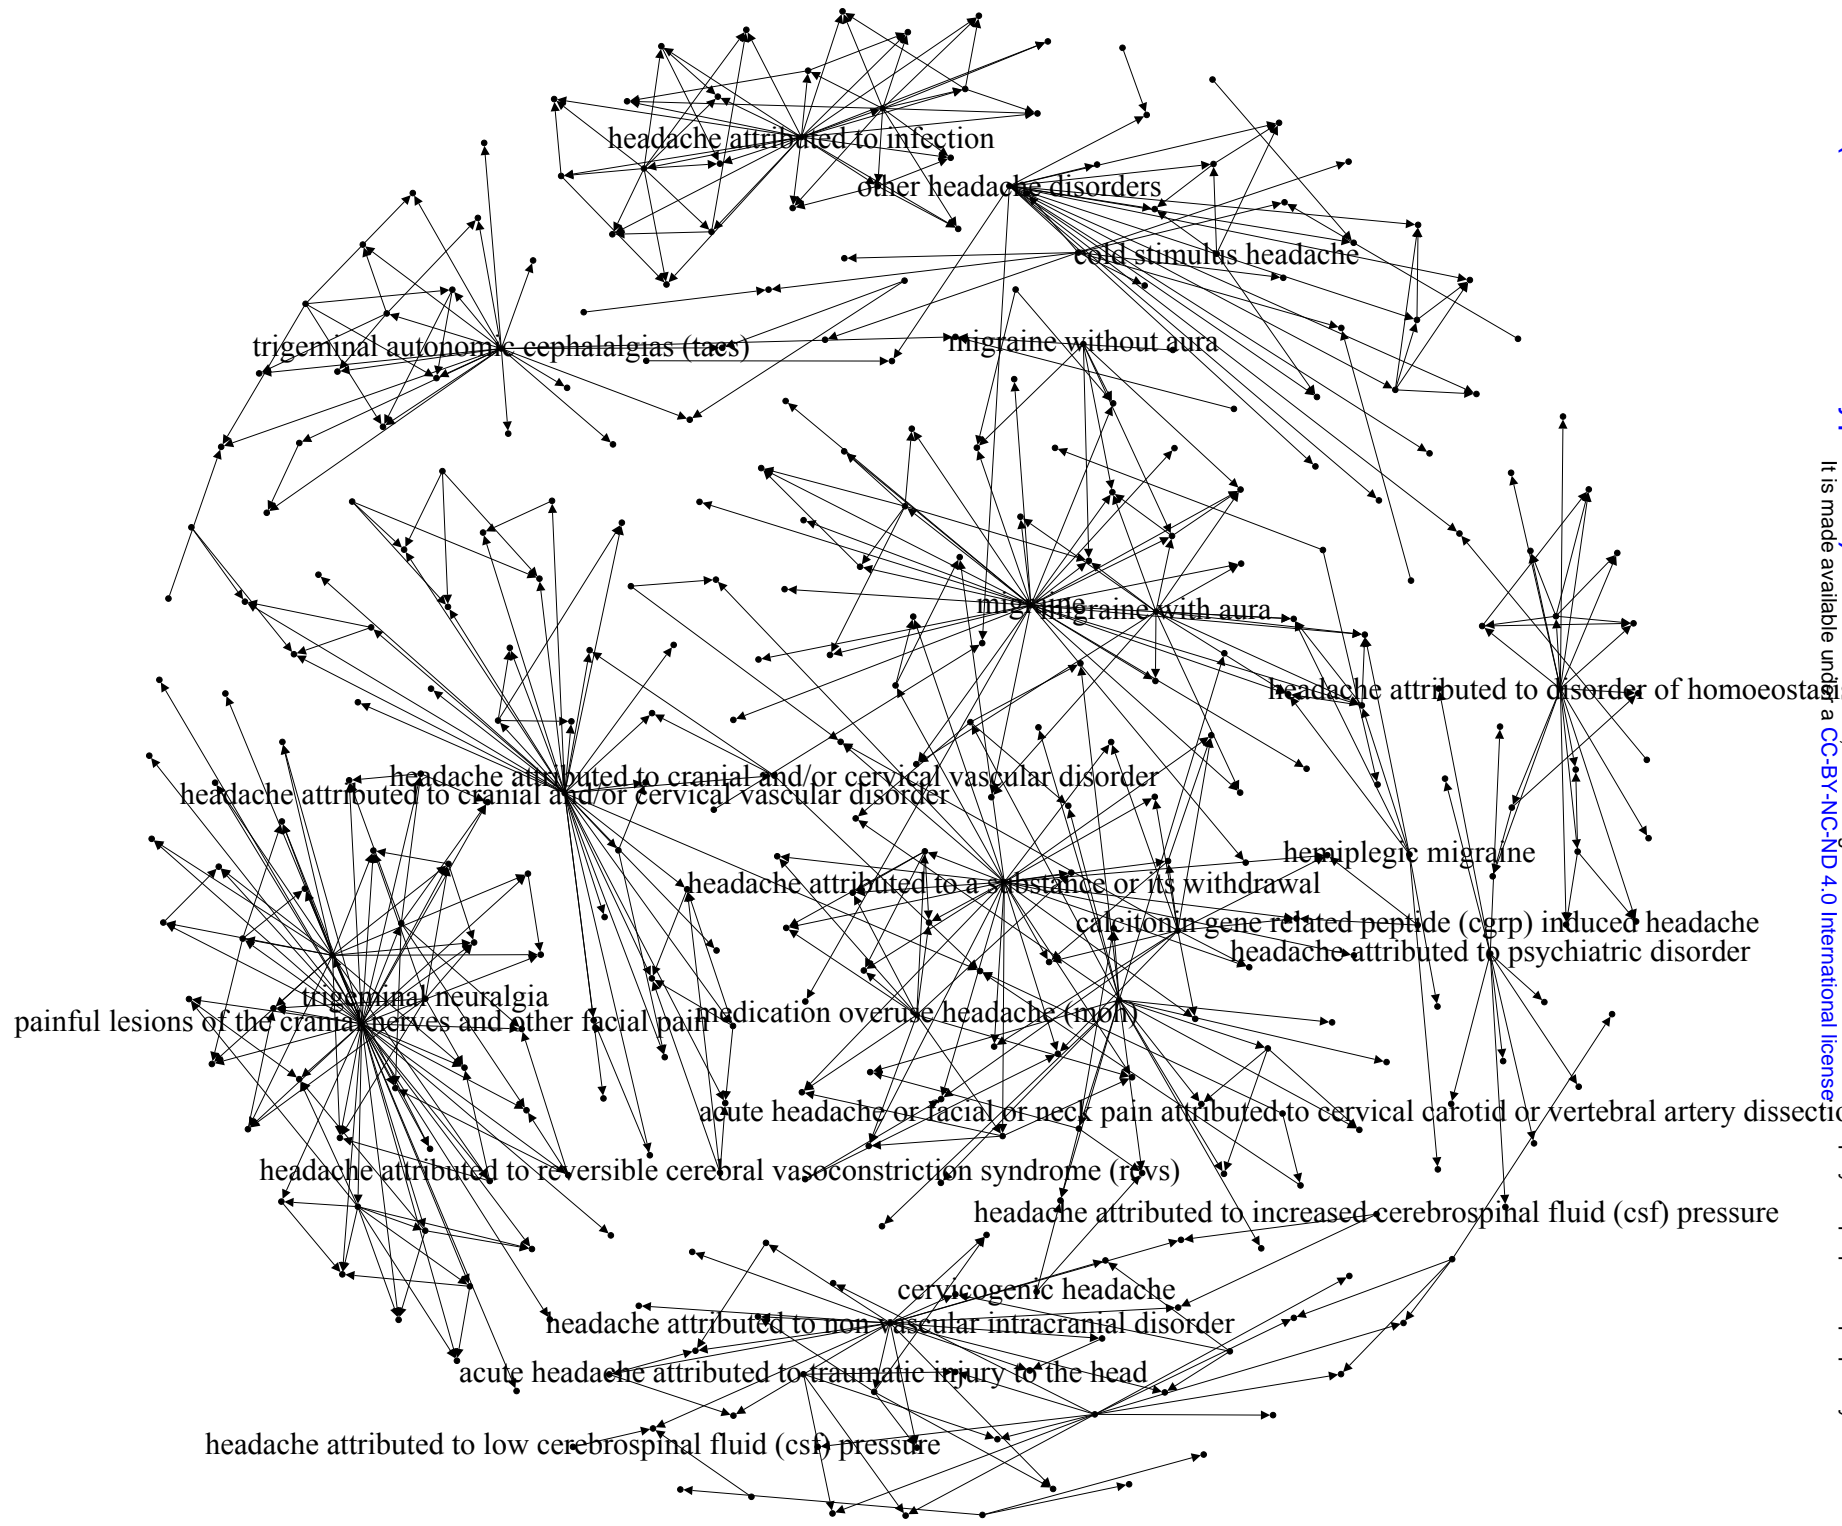

Source: https://medrxiv.org/content/medrxiv/early/2021/11/01/2021.11.01.21265723.full.pdf
